# Supplementary material for: Does a “Cushion Effect” Really Exist? A Morphomic Analysis of Vulnerable Road Users with Serious Blunt Abdominal Injury
Source: MDPI journal article supplement (doi:10.3390/healthcare9081006), 2021-08-06
Supplement: s1 [file s1]

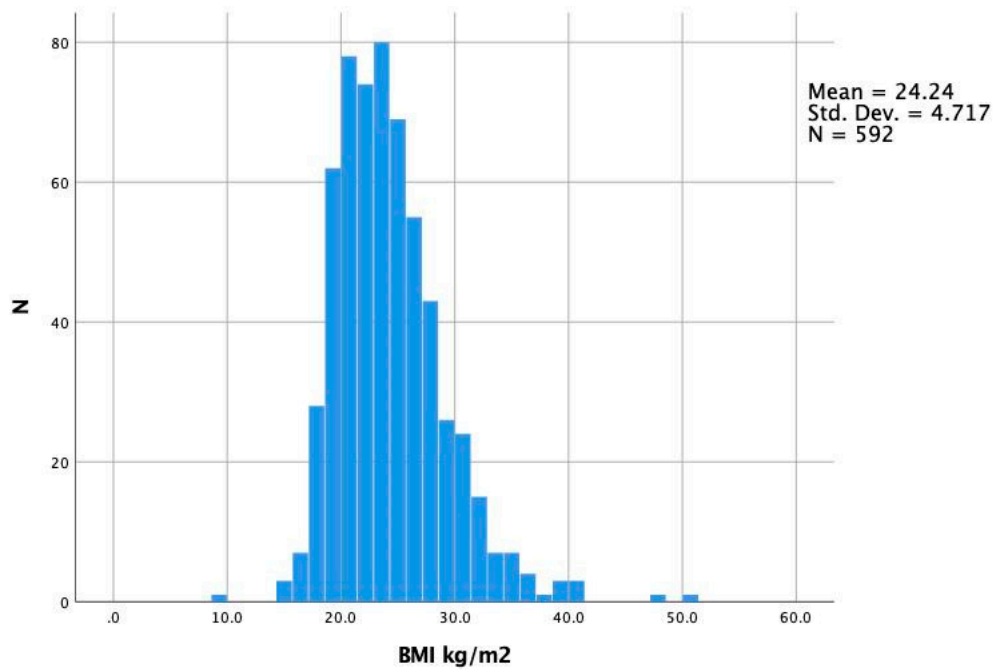

**Supplementary Figure S1.** The BMI distribution of vulnerable road users (VRUs) in the cohort was demonstrated.

**Supplementary Table S1.** Vulnerable road users (VRUs) were stratified by using BMI classification. There was no significant difference in the serious abdominal injury (MAIS<sub>abd</sub>  $\geq$  3) rate between the BMI groups, but obese VRU had a significantly higher mortality rate (14.1%) than the other BMI groups ( $p = 0.012$ ).

| BMI classification | kg/m <sup>2</sup>   | n   | MAIS <sub>abd</sub> $\geq$ 3 | Mortality rate |
|--------------------|---------------------|-----|------------------------------|----------------|
| <b>Total</b>       |                     | 592 | 17.6%                        | 5.4%           |
| <b>Underweight</b> | <18.5               | 39  | 23.1%                        | 2.6%           |
| <b>Normal</b>      | $\geq$ 18.5 to 24.9 | 336 | 17.3%                        | 4.2%           |
| <b>Overweight</b>  | $\geq$ 25.0 to 29.9 | 153 | 15.0%                        | 5.2%           |
| <b>Obese</b>       | $\geq$ 30           | 64  | 21.9%                        | 14.1%          |
| p value            |                     |     | 0.505                        | 0.012*         |

\* Statistically significant.

**Supplementary Table S2.** Mean visceral fat and subcutaneous fat areas from the T9-L5 vertebral levels are shown. Vulnerable road users with serious abdominal injury ( $\text{MAIS}_{\text{abd}} \geq 3$ ) had lower fat areas at most of the levels. After adjusting the morphomic variables according to the corresponding total body area (TBA), the fat ratio at each vertebral level is shown.

| Morphomic Variables                     | Vertebral Level | All<br>n = 592     | $\text{MAIS}_{\text{abd}} < 3$<br>n = 488 | $\text{MAIS}_{\text{abd}} \geq 3$<br>n = 104 | p-value |
|-----------------------------------------|-----------------|--------------------|-------------------------------------------|----------------------------------------------|---------|
| Visceral fat area ( $\text{cm}^2$ )     | T9              | 35.65 $\pm$ 28.38  | 36.52 $\pm$ 29.22                         | 31.42 $\pm$ 23.50                            | 0.063   |
|                                         | T10             | 40.36 $\pm$ 38.35  | 41.30 $\pm$ 39.43                         | 35.91 $\pm$ 32.61                            | 0.193   |
|                                         | T11             | 53.59 $\pm$ 57.49  | 54.38 $\pm$ 59.15                         | 49.92 $\pm$ 49.09                            | 0.473   |
|                                         | T12             | 68.49 $\pm$ 70.37  | 69.72 $\pm$ 72.30                         | 62.75 $\pm$ 60.52                            | 0.360   |
|                                         | L1              | 80.63 $\pm$ 75.39  | 81.84 $\pm$ 77.24                         | 74.95 $\pm$ 66.07                            | 0.398   |
|                                         | L2              | 85.33 $\pm$ 75.27  | 87.14 $\pm$ 77.54                         | 76.87 $\pm$ 63.19                            | 0.151   |
|                                         | L3              | 80.95 $\pm$ 67.55  | 82.47 $\pm$ 69.08                         | 73.83 $\pm$ 59.60                            | 0.237   |
|                                         | L4              | 77.3 $\pm$ 54.95   | 78.55 $\pm$ 56.11                         | 71.39 $\pm$ 48.98                            | 0.228   |
|                                         | L5              | 66.56 $\pm$ 43.88  | 67.59 $\pm$ 45.04                         | 61.78 $\pm$ 37.83                            | 0.223   |
| Subcutaneous fat area ( $\text{cm}^2$ ) | T9              | 70.66 $\pm$ 54.97  | 71.43 $\pm$ 54.83                         | 66.92 $\pm$ 55.79                            | 0.460   |
|                                         | T10             | 62.2 $\pm$ 51.69   | 63.40 $\pm$ 51.56                         | 56.56 $\pm$ 52.14                            | 0.221   |
|                                         | T11             | 60.84 $\pm$ 52.97  | 62.05 $\pm$ 52.85                         | 55.14 $\pm$ 53.46                            | 0.228   |
|                                         | T12             | 66.98 $\pm$ 57.8   | 68.01 $\pm$ 57.27                         | 62.18 $\pm$ 60.29                            | 0.351   |
|                                         | L1              | 83.75 $\pm$ 67.29  | 84.77 $\pm$ 66.8                          | 78.93 $\pm$ 69.69                            | 0.422   |
|                                         | L2              | 108.38 $\pm$ 76.76 | 109.89 $\pm$ 76.18                        | 101.29 $\pm$ 79.42                           | 0.300   |
|                                         | L3              | 133.15 $\pm$ 86.37 | 135.22 $\pm$ 85.81                        | 123.44 $\pm$ 88.69                           | 0.207   |
|                                         | L4              | 152.3 $\pm$ 96.12  | 154.97 $\pm$ 96.19                        | 139.80 $\pm$ 95.28                           | 0.144   |
|                                         | L5              | 151.77 $\pm$ 96.4  | 154.75 $\pm$ 96.25                        | 137.94 $\pm$ 96.40                           | 0.108   |
| Visceral fat ratio (%)                  | T9              | 5.7 $\pm$ 3.6%     | 5.8 $\pm$ 3.6%                            | 5.2 $\pm$ 3.3%                               | 0.118   |
|                                         | T10             | 6.4 $\pm$ 4.8%     | 6.5 $\pm$ 4.8%                            | 5.9 $\pm$ 4.5%                               | 0.201   |
|                                         | T11             | 8.3 $\pm$ 7.3%     | 8.4 $\pm$ 7.4%                            | 8.1 $\pm$ 7.0%                               | 0.698   |
|                                         | T12             | 10.8 $\pm$ 9.3%    | 10.9 $\pm$ 9.4%                           | 10.2 $\pm$ 8.7%                              | 0.492   |
|                                         | L1              | 13.1 $\pm$ 10.0%   | 13.2 $\pm$ 10.1%                          | 12.6 $\pm$ 9.5%                              | 0.553   |
|                                         | L2              | 14.3 $\pm$ 9.9%    | 14.6 $\pm$ 10.0%                          | 13.3 $\pm$ 9.0%                              | 0.205   |
|                                         | L3              | 14.0 $\pm$ 9.0%    | 14.2 $\pm$ 9.1%                           | 13.0 $\pm$ 8.5%                              | 0.241   |
|                                         | L4              | 13.8 $\pm$ 7.3%    | 14.0 $\pm$ 7.3%                           | 12.9 $\pm$ 7.1%                              | 0.191   |
|                                         | L5              | 11.8 $\pm$ 5.9%    | 11.9 $\pm$ 6.0%                           | 11.1 $\pm$ 5.4%                              | 0.214   |
| SubQ fat ratio (%)                      | T9              | 11.5 $\pm$ 7.6%    | 11.6 $\pm$ 7.6%                           | 10.8 $\pm$ 7.4%                              | 0.331   |
|                                         | T10             | 10.3 $\pm$ 7.1%    | 10.5 $\pm$ 7.2%                           | 9.2 $\pm$ 7.0%                               | 0.099   |
|                                         | T11             | 10.0 $\pm$ 7.1%    | 10.3 $\pm$ 7.1%                           | 9.0 $\pm$ 7.0%                               | 0.089   |
|                                         | T12             | 11.2 $\pm$ 7.7%    | 11.4 $\pm$ 7.6%                           | 10.2 $\pm$ 8.0%                              | 0.152   |

|    |                   |                   |                   |        |
|----|-------------------|-------------------|-------------------|--------|
| L1 | $14.4 \pm 9.0\%$  | $14.7 \pm 8.9\%$  | $13.4 \pm 9.4\%$  | 0.181  |
| L2 | $19.4 \pm 10.2\%$ | $19.7 \pm 10.1\%$ | $17.8 \pm 10.6\%$ | 0.070  |
| L3 | $24.3 \pm 11.1\%$ | $24.8 \pm 10.9\%$ | $22.1 \pm 11.5\%$ | 0.022* |
| L4 | $27.5 \pm 12\%$   | $28.1 \pm 11.9\%$ | $24.9 \pm 12.0\%$ | 0.015* |
| L5 | $26.7 \pm 12.3\%$ | $27.3 \pm 12.2\%$ | $24.0 \pm 12.4\%$ | 0.013* |

\* Statistically significant.
